# Supplementary material for: Hierarchical N/S co-doped carbon anodes fabricated through a facile ionothermal polymerization for high-performance sodium ion batteries
Source: Royal Society of Chemistry journal article supplement (doi:10.1039/c8ta11921j), 2019-01-01
Supplement: c8ta11921j1.pdf [file c8ta11921j1.pdf]

1

## Supporting Information

2 **Hierarchical N/S co-doped carbon anodes fabricated through facile**

3 **ionothermal polymerization for high-performance sodium ion batteries**

4 Wenlong Shao,<sup>a</sup> Fangyuan Hu,<sup>b,\*</sup> Ce Song,<sup>c</sup> Jinyan Wang,<sup>a</sup> Cheng Liu,<sup>a</sup> Zhihuan Weng,<sup>a</sup>

5 Xigao Jian<sup>a,b,c,\*</sup>

6

7 <sup>a</sup> *State Key Laboratory of Fine Chemicals, Liaoning Province Engineering Research Centre of*

8 *High Performance Resins. Dalian University of Technology, Dalian, 116024, China. \*E-mail:*

9 *hufangyuan@dlut.edu.cn*

10 <sup>b</sup> *School of Materials Science and Engineering, State Key Laboratory of Fine Chemicals, Liaoning*

11 *Province Engineering Centre of High Performance Resins. Dalian University of Technology,*

12 *Dalian 116024, China.*

13 <sup>c</sup> *School of Mathematical Sciences, Dalian University of Technology, Dalian 116024, China.*

14

### 15 **Table of content**

16 1. Experimental section.

17 2. FT-IR spectra and TGA curves of the precursors.

18 3. SEM, TEM of the products.

19 4. FT-IR, XRD, Raman curves of the products.

20 5. Electrochemical performance of the products.

1 **1. Experimental section.**

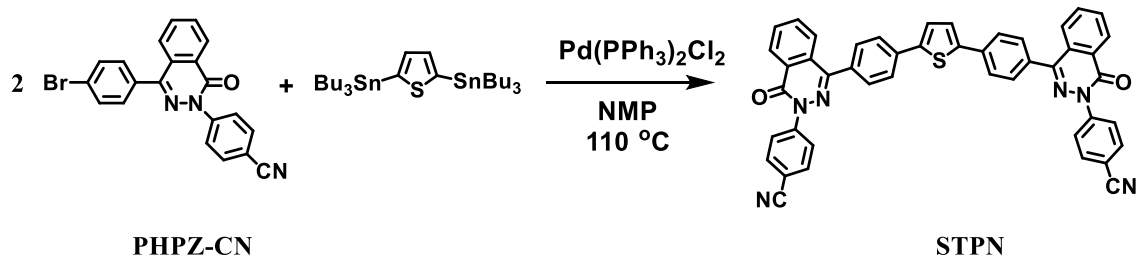

Synthesis of monomers and polymers:

Compound **PHPZ-CN** and **2,5-bis(tributylstannyl)thiophene** were synthesized according to the literature.<sup>[1-2]</sup>

**4,4'-(thiophene-2,5-diylbis(4,1-phenylene))bis(1-oxophthalazine-4,2(1H)-diyl)dibenzonitrile (STPN)**. To a mixture of PHPZ-CN (3.538 g, 8.8 mmol) and 2,5-bis(tributylstannyl)thiophene (2.646 g, 4.0 mmol) in *N*-methyl-2-pyrrolidone (NMP) 30 mL, PdCl<sub>2</sub>(PPh<sub>3</sub>)<sub>2</sub> (0.124 g, 0.18 mmol) was added under a N<sub>2</sub> atmosphere. The mixture was stirred for 42 h under 110 °C. The resulting mixture was poured into water, then a greyish-green precipitate was filtered. The resulting solid was washed with hot NMP, *N,N*-dimethyl acetamide (DMAc), ethanol and water, and subjected to Soxhlet extraction successively with tetrahydrofuran and ethanol, then dried under vacuum. 1.30 g of faint yellow product was obtained (yield: 44.83%). Calcd for C<sub>46</sub>H<sub>26</sub>N<sub>6</sub>O<sub>2</sub>S: 726.1838, ToF MS EI<sup>+</sup> found 726.1804. Anal. Calcd for C<sub>46</sub>H<sub>26</sub>N<sub>6</sub>O<sub>2</sub>S: C, 76.02; H, 3.61; N, 11.56; S, 4.41. Found: C, 75.84; H, 3.44; N, 11.41; S, 4.77.

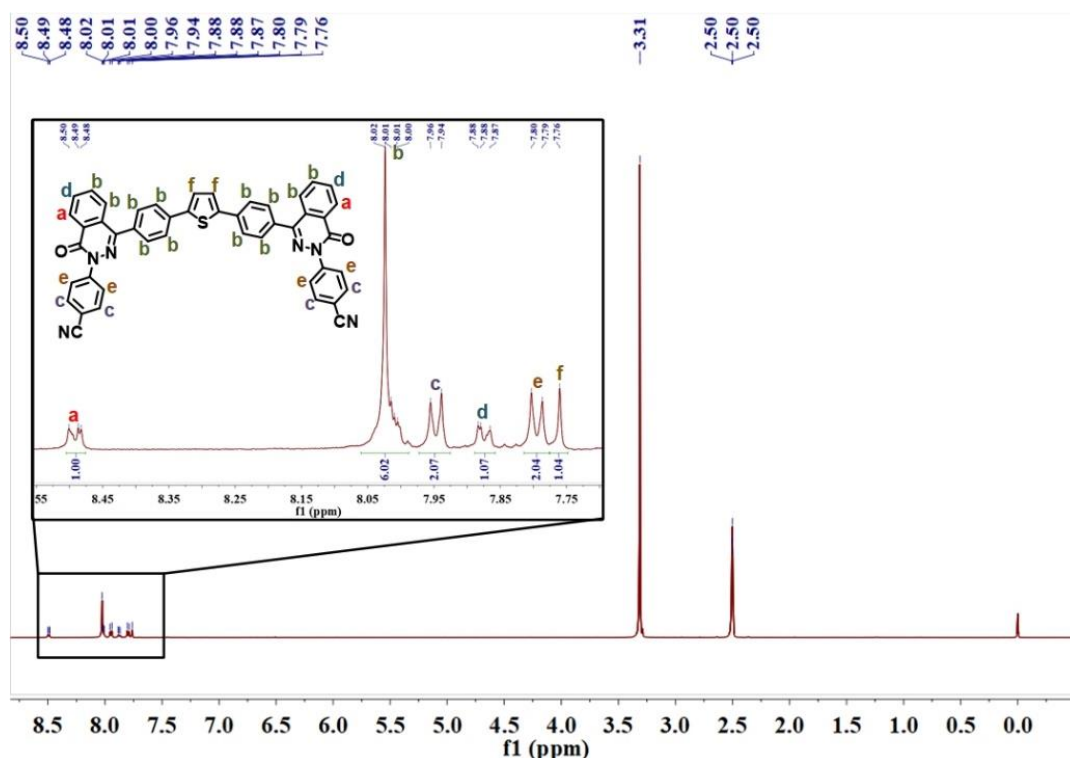

**Figure S1.** <sup>1</sup>H-NMR spectrum of STPN (in DMSO-d<sub>6</sub>).

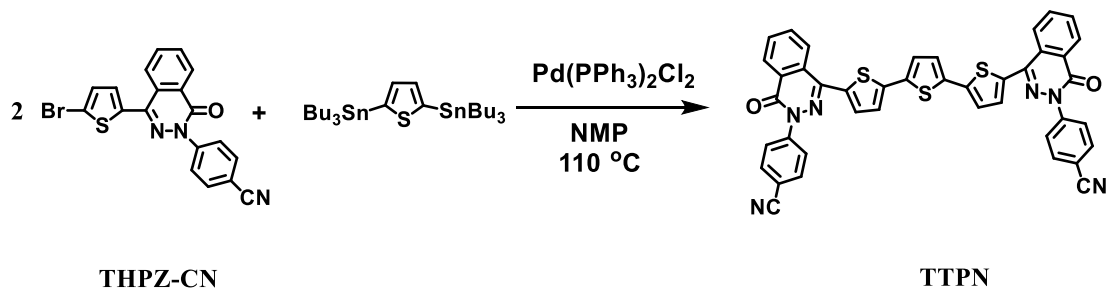

1  
2  
3  
4  
5  
6  
7  
8  
9  
10  
11  
12  
13  
14  
15

Compound **THPZ-CN** was synthesized according to the literature.<sup>[1]</sup>  
**4,4'-([2,2':5',2''-terthiophene]-5,5''-diylbis(1-oxophthalazine-4,2(1H)-diyl)) dibenzonitrile (TTPN)**. To a mixture of THPZ-CN (3.590 g, 8.8 mmol) and 2,5-bis(tributylstannyl)thiophene (2.646 g, 4.0 mmol) in *N*-methyl-2-pyrrolidone (NMP) 30 mL, PdCl<sub>2</sub>(PPh<sub>3</sub>)<sub>2</sub> (0.124 g, 0.18 mmol) was added under a N<sub>2</sub> atmosphere. The mixture was stirred for 42 h under 110 °C. The resulting mixture was poured into water, then a salmon precipitate was filtered. The resulting solid was washed with hot NMP, *N,N*-dimethyl acetamide (DMAC), ethanol and water, and subjected to Soxhlet extraction successively with tetrahydrofuran and ethanol, then dried under vacuum. 2.15 g of red product was obtained (yield: 72.83%). Calcd for C<sub>42</sub>H<sub>22</sub>N<sub>6</sub>O<sub>2</sub>S<sub>3</sub>: 738.0966, ToF MS EI<sup>+</sup> found 738.0968. Anal. Calcd for C<sub>42</sub>H<sub>22</sub>N<sub>6</sub>O<sub>2</sub>S<sub>3</sub>: C, 68.28; H, 3.00; N, 11.37; S, 13.02. Found: C, 62.81; H, 2.82; N, 9.79; S, 12.72.

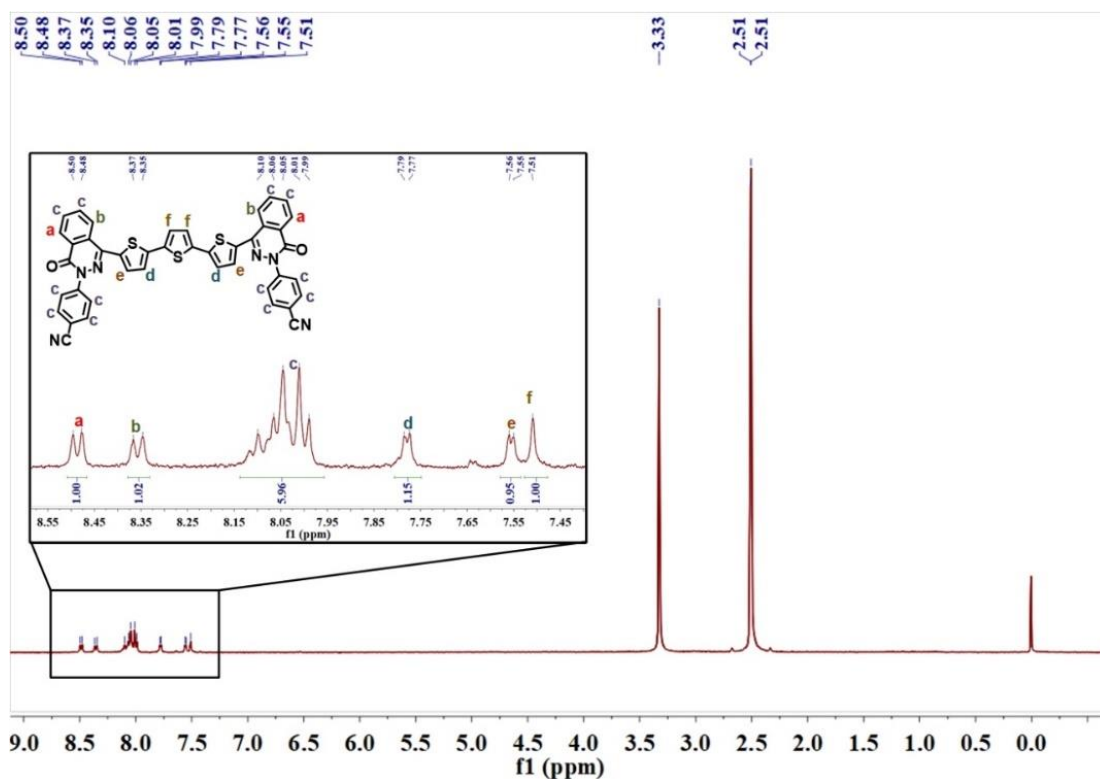

Figure S2. <sup>1</sup>H-NMR spectrum of TTPN (in DMSO-d<sup>6</sup>).

1 2. FT-IR spectra and TGA curves of the precursors.

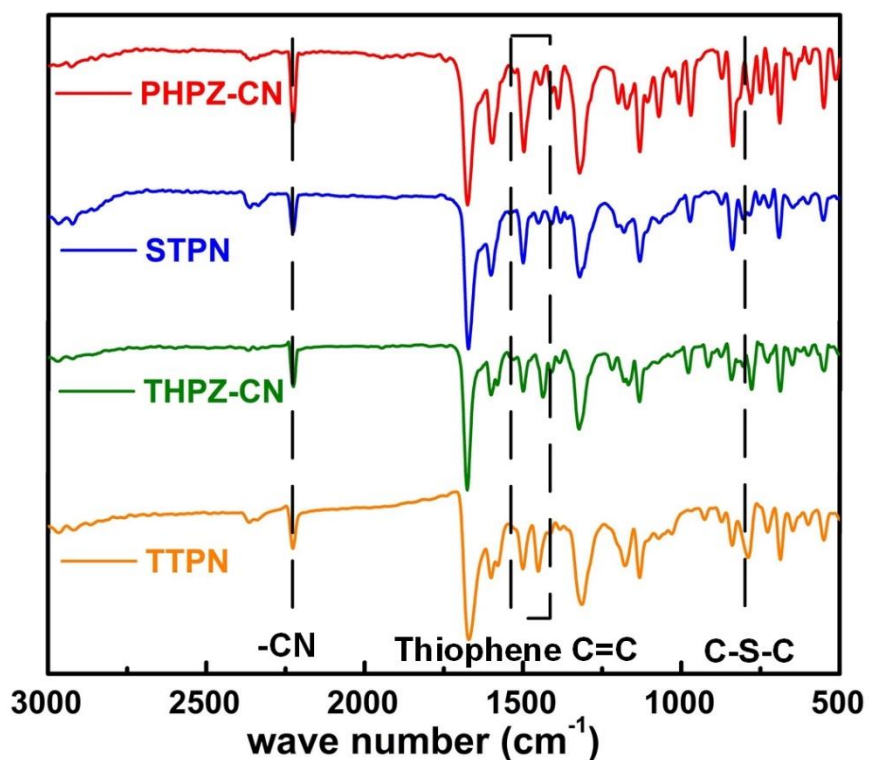

2

3 **Figure S3.** FT-IR spectra of PHPZ-CN, THPZ-CN, STPN, and TTPN.

4

5 All the precursors showed the characteristic absorption peak in 2230 cm<sup>-1</sup>, indicating  
6 that -CN existed in all the precursors. Characteristic absorption peak in ~800 cm<sup>-1</sup>  
7 representing the C-S-C bond in thiophene, indicating that the PHPZ-CN transferred into  
8 STPN successfully.

9

10

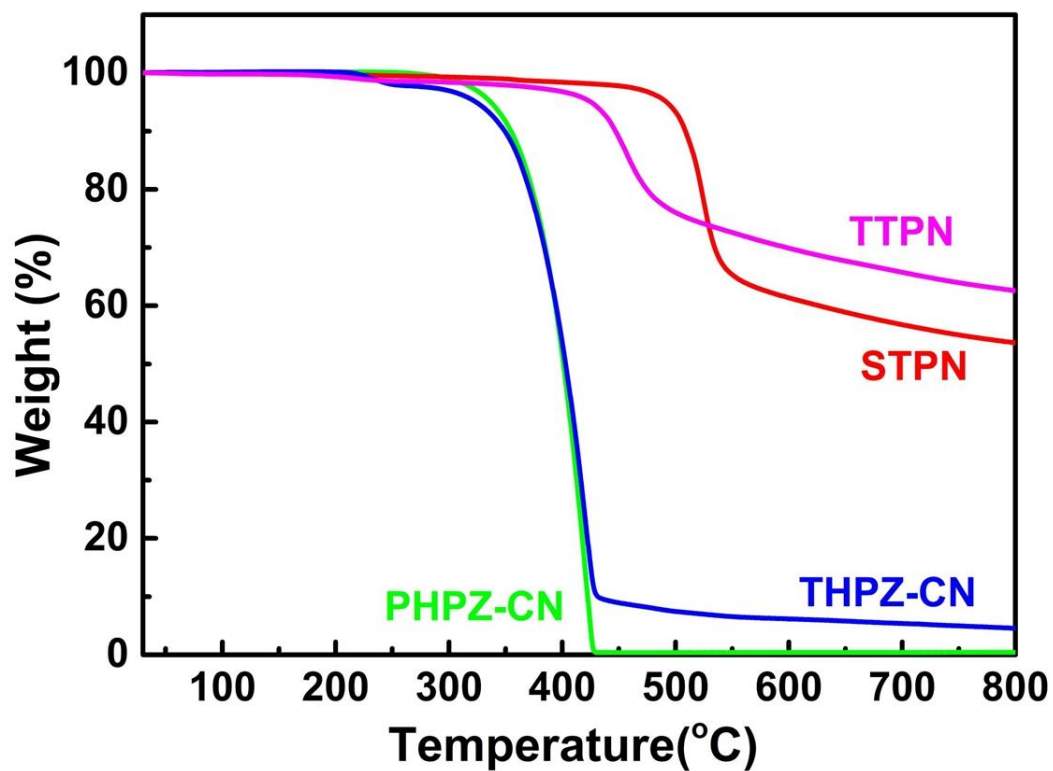

1

2

3

4

5

6

7

8

9

10

**Figure S4.** TGA curves of PHPZ-CN, THPZ-CN, STPN, and TTPN.

TGA curves showed that both of STPN and TTPN were going to degrade over 400 °C, the degradation temperature is higher than PHPH-CN and THPZ-CN, indicating the PHPZ-CN and TPHZ-CN transferred into STPN and TTPN successfully after the conversion reaction.

- 1  
2 3. SEM, TEM of the products.

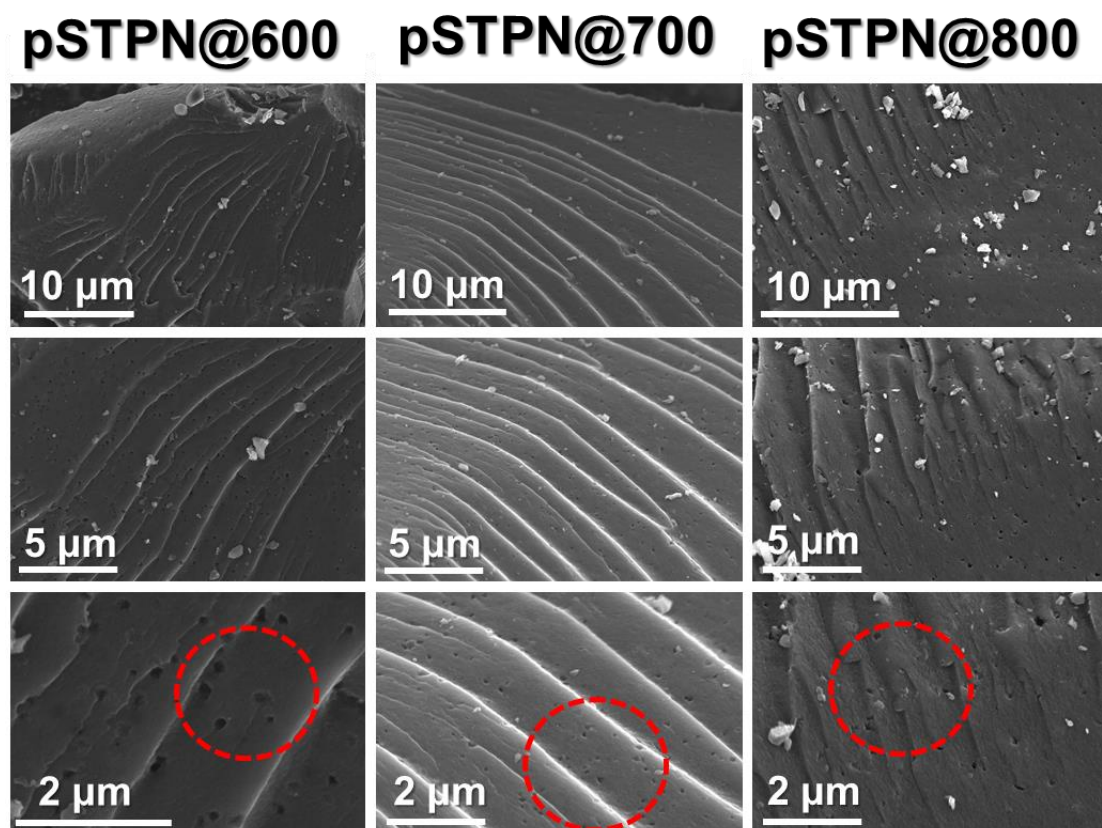

- 3  
4 **Figure S5.** The SEM images of pSTPN@600, pSTPN@700, and pSTPN@800.

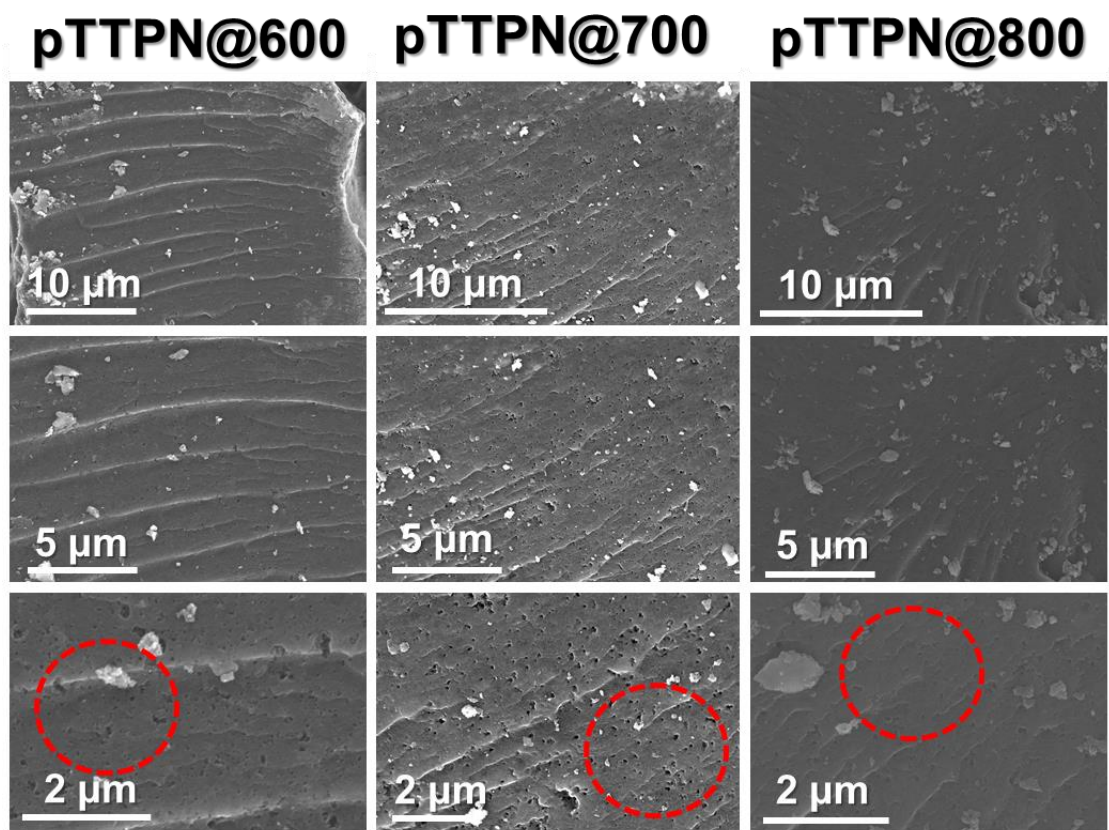

1

2

**Figure S6.** The SEM images of pTTPN@600, pTTPN@700, and pTTPN@800.

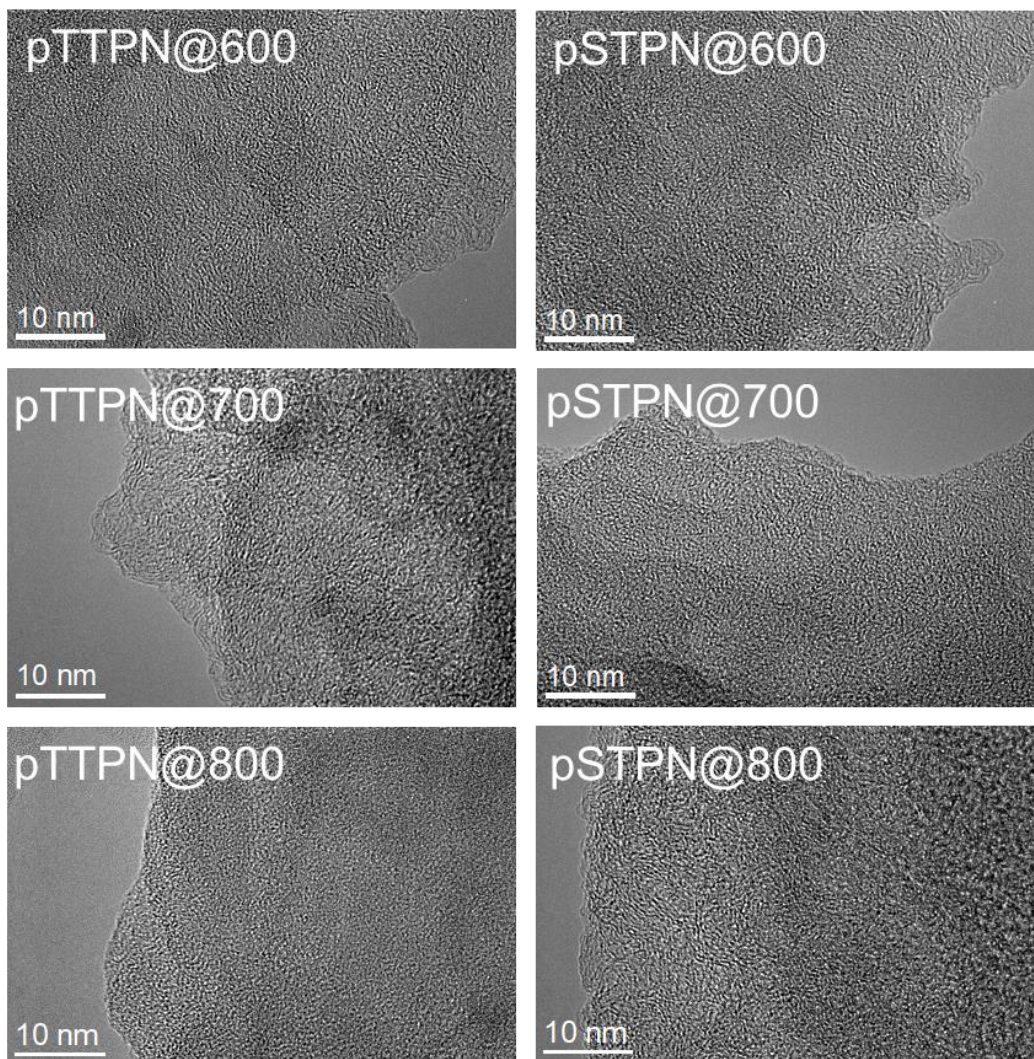

1

2

3

**Figure S7.** The TEM images of pTTPN@600, pTTPN@700, pTTPN@800, pSTPN@600, pSTPN@700, and pSTPN@800.



1 4. FT-IR, XRD, and Raman curves of the products.

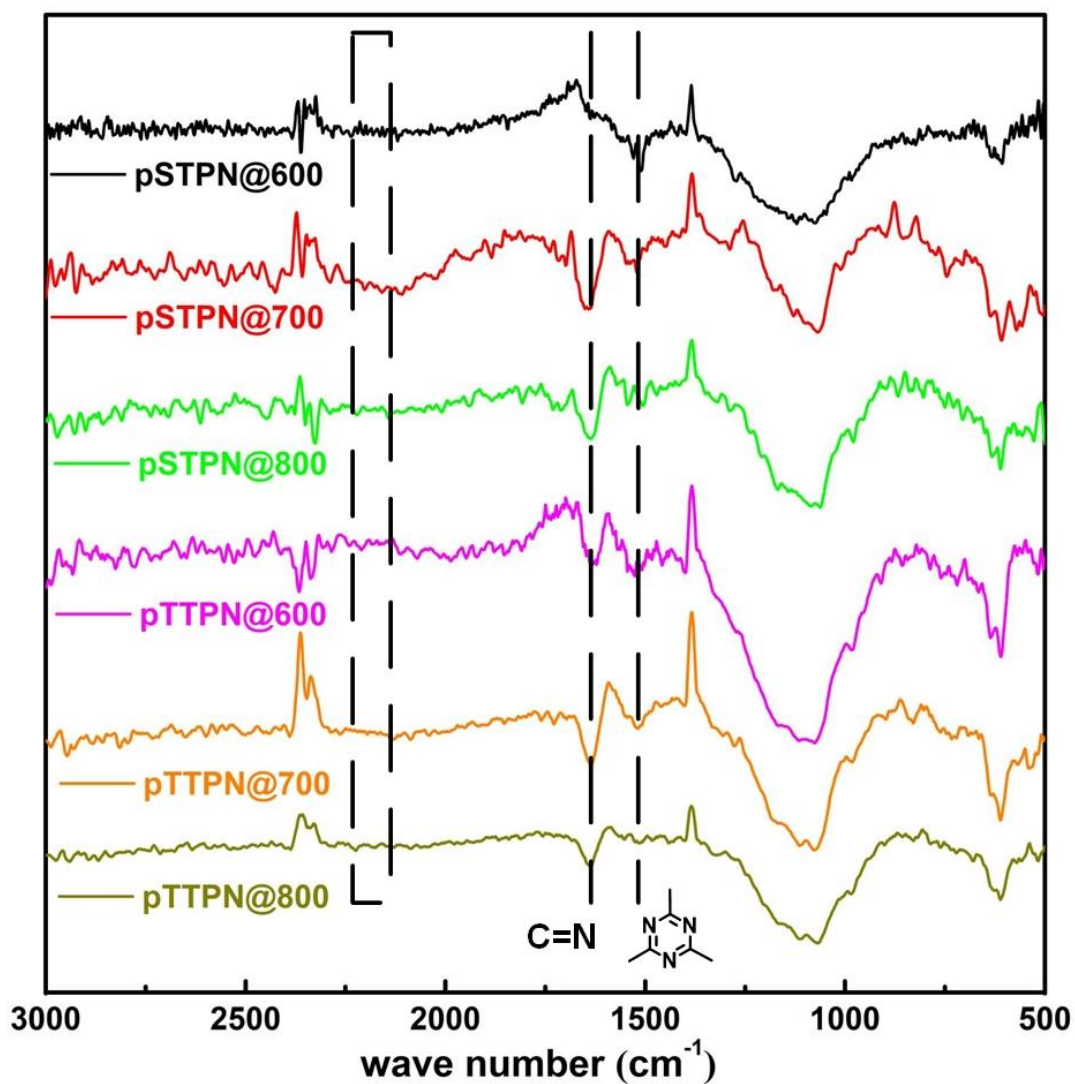

2

3 **Figure S8.** FT-IR spectra of pSTPN@600, pSTPN@700, pSTPN@800, pTTPN@600,  
4 pTTPN@700, and pTTPN@800.

5

6 Figure S8 showed that characteristic absorption peak of  $-\text{CN}$  in  $2230 \text{ cm}^{-1}$  disappeared,  
7 and characteristic absorption peak representing the triazine ring appeared after  
8 ionothermal reaction, indicating the formation of porous polymer-derived carbon.

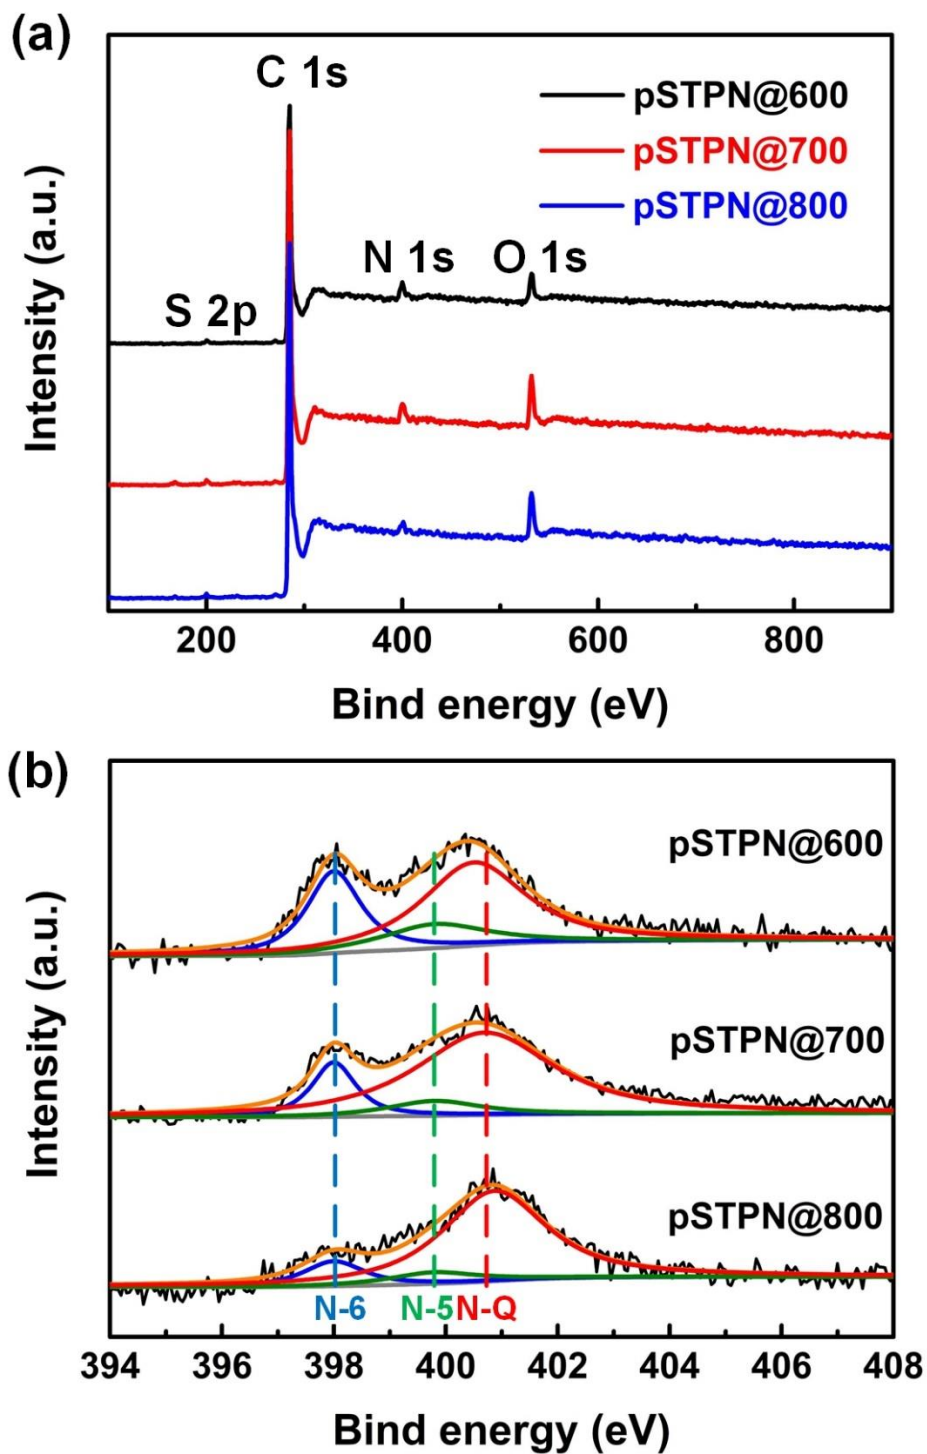

1  
 2 **Figure S9.** a) X-ray photoelectron spectra (XPS) of pSTPN@600, pSTPN@700, and  
 3 pSTPN@800. b) High-resolution N 1s XPS spectra of pSTPN@600, pSTPN@700, and  
 4 pSTPN@800.

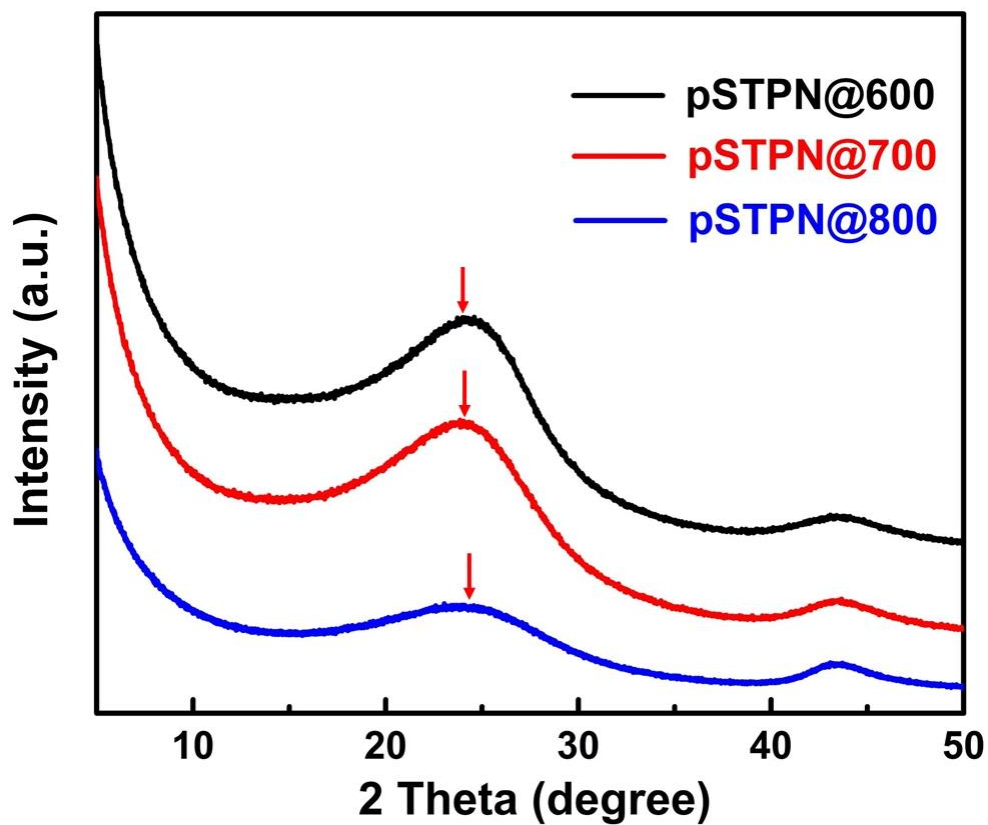

1

2

Figure S10. XRD patterns of pSTPN@600, pSTPN@700, and pSTPN@800.

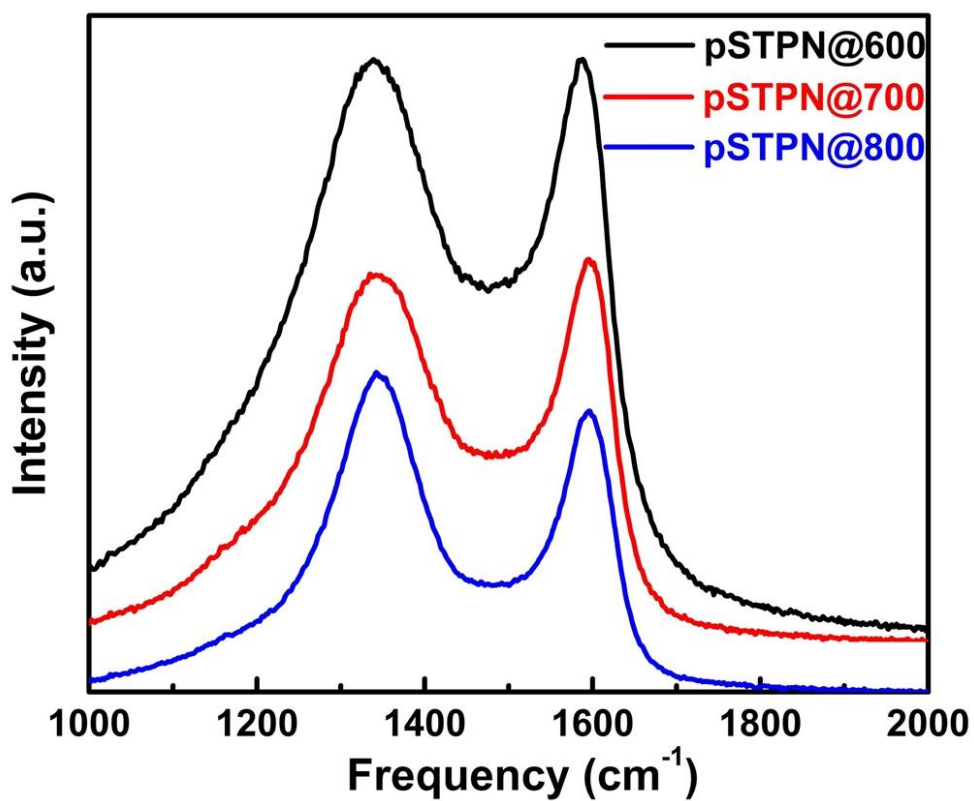

3

4

Figure S11. Raman spectra of pSTPN@600, pSTPN@700, and pSTPN@800.

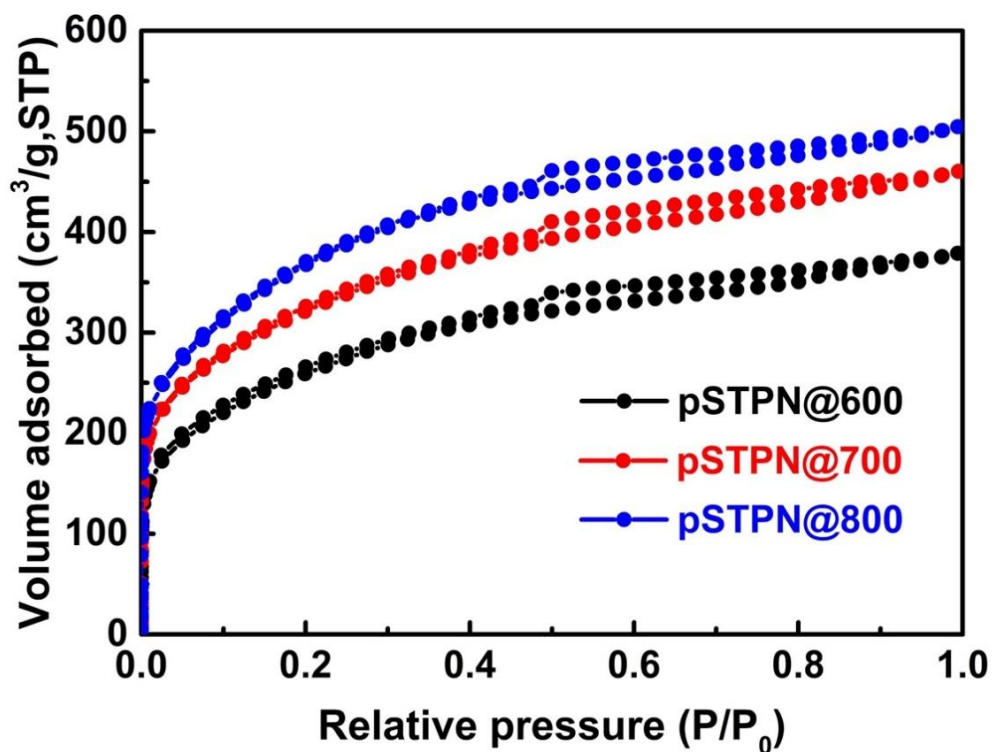

1

2 **Figure S12.** N<sub>2</sub> adsorption-desorption isothermal curves of pSTPN@600, pSTPN@700,  
 3 and pSTPN@800.

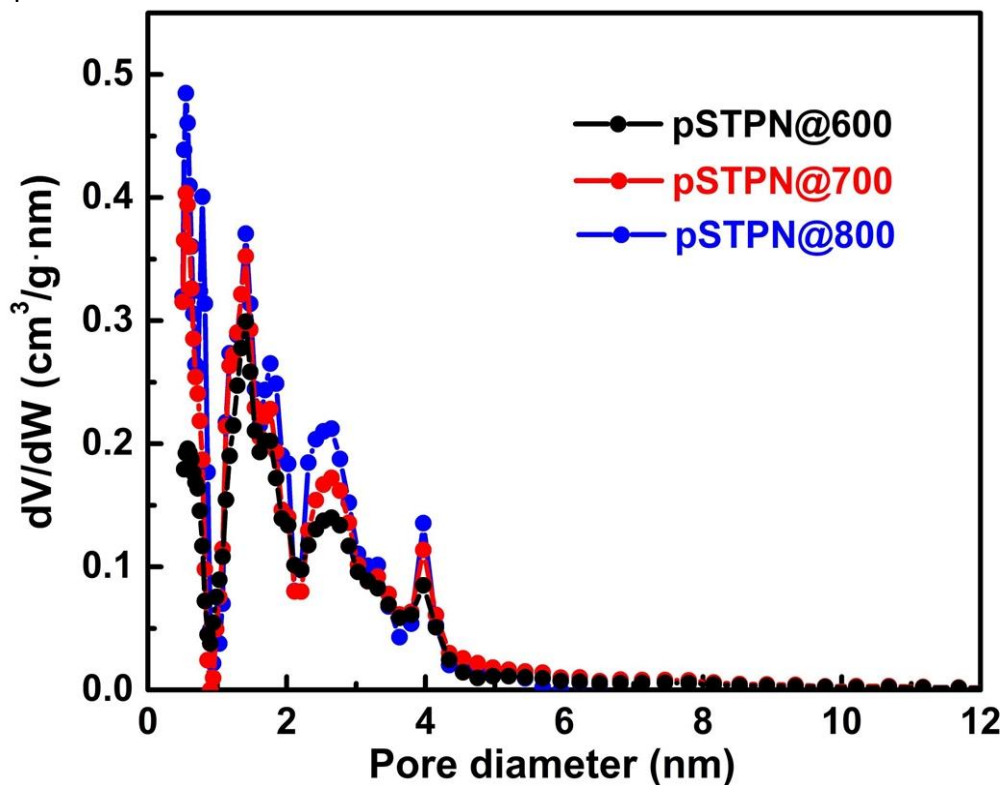

4

5 **Figure S13.** Pore size distribution of pSTPN@600, pSTPN@700, and pSTPN@800  
 6 calculated by DFT method.

7

8

1  
2

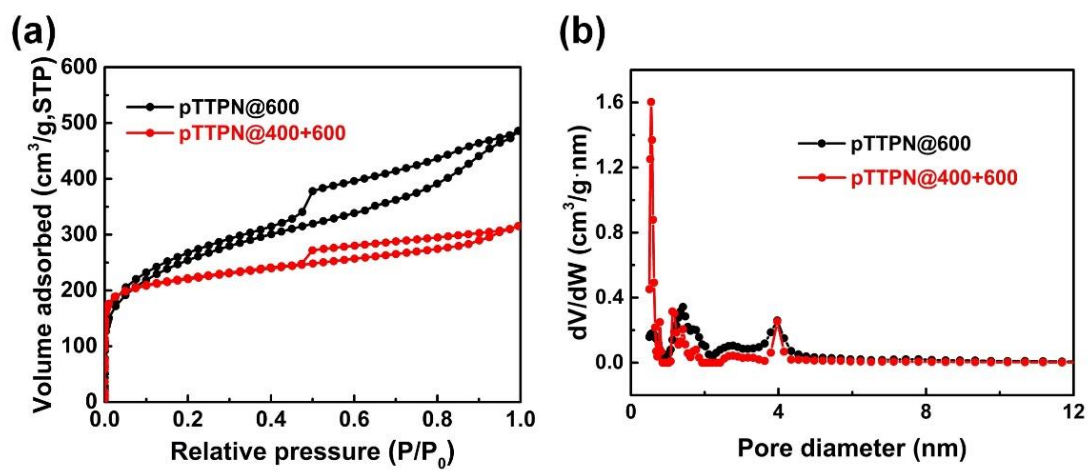

3  
4  
5  
6  
7

**Figure S14.** N<sub>2</sub> adsorption-desorption isothermal curves (a) and corresponding pore size distribution (b) of pTTPN@400+600 and pTTPN@600.

1 **5. Electrochemical performance of the products.**

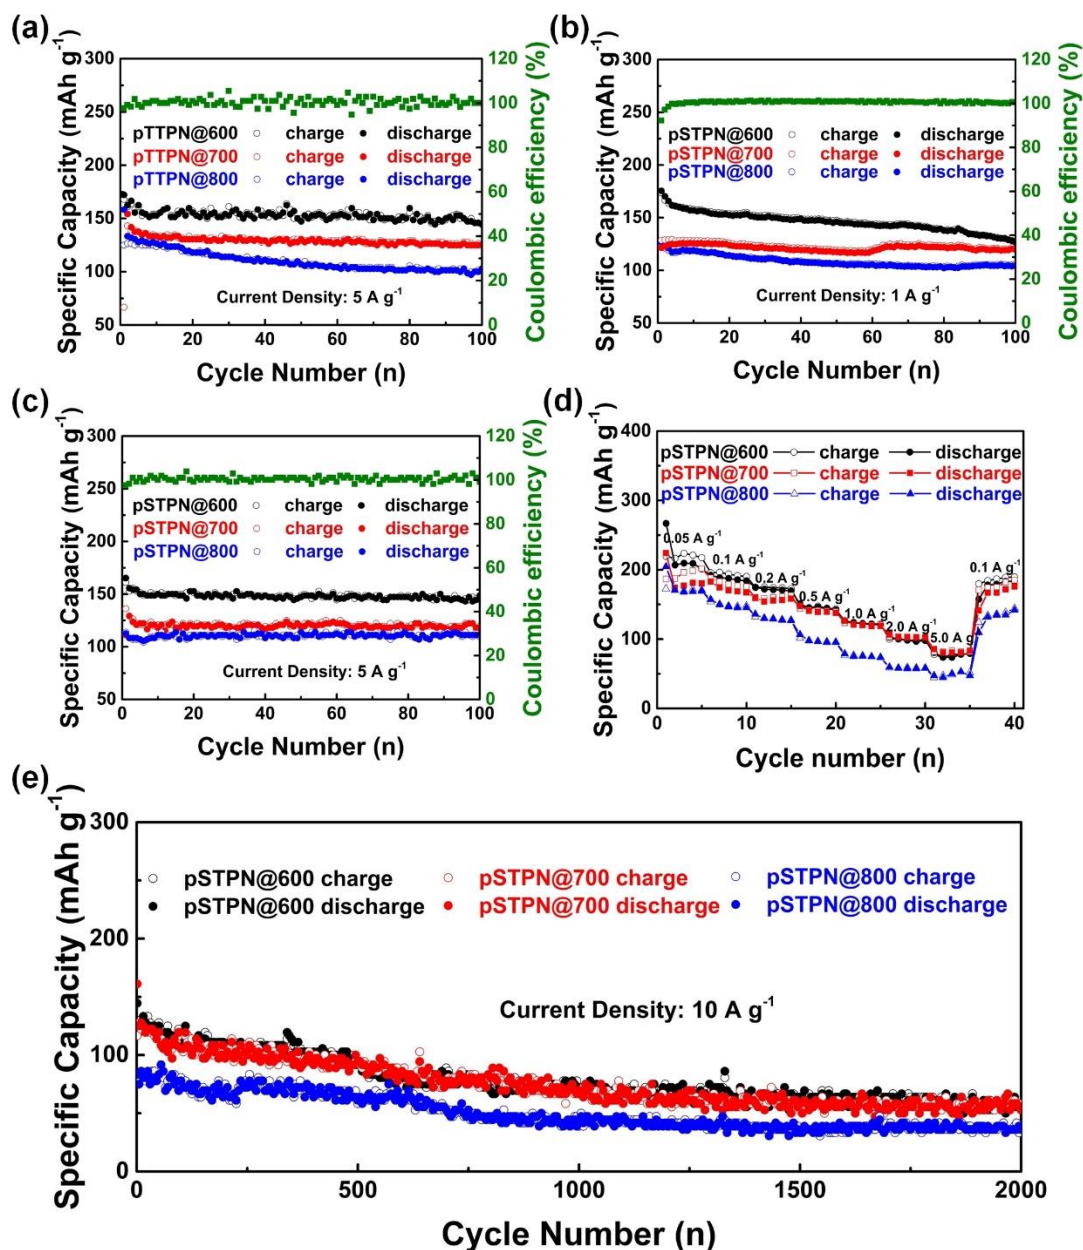

2

3 **Figure S15.** a) Cycling performance of pTTPN@600, pTTPN@700, and pTTPN@800  
 4 electrodes at the current density of 5 A g<sup>-1</sup>. b,c) Cycling performance of pSTPN@600,  
 5 pSTPN@700, and pSTPN@800 electrodes at the current density of 1 A g<sup>-1</sup> and 5 A g<sup>-1</sup>.  
 6 d) Rate performance of pSTPN@600, pSTPN@700, and pSTPN@800 electrodes at the  
 7 current densities of 0.05, 0.1, 0.2, 0.5, 1.0, 2.0, and 5.0 A g<sup>-1</sup>. e) Long cycle performance  
 8 of pSTPN@600, pSTPN@700, and pSTPN@800 electrodes at the current density of 10  
 9 A g<sup>-1</sup>.

10

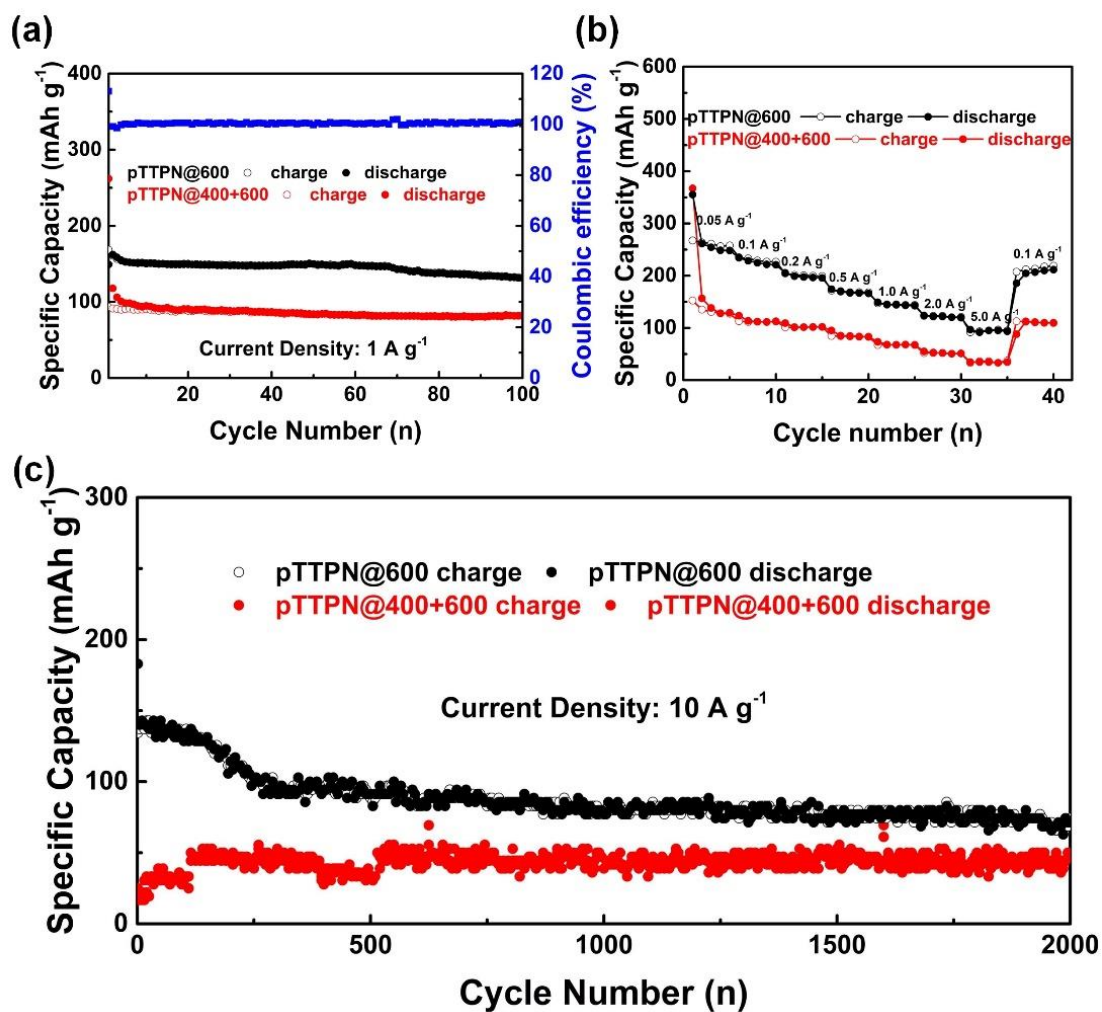

1  
2  
3  
4  
5  
6  
7  
8  
9

**Figure S16.** (a) Cycling performance of pTTPN@400+600 and pTTPN@600 at the current density of  $1 \text{ A g}^{-1}$ . (b) Rate performance of pTTPN@400+600 and pTTPN@600 electrodes at the current densities of 0.05, 0.1, 0.2, 0.5, 1.0, 2.0, and 5.0  $\text{A g}^{-1}$ . (c) Long cycle performance of pTTPN@400+600 and pTTPN@600 electrodes at the current density of  $10 \text{ A g}^{-1}$ .

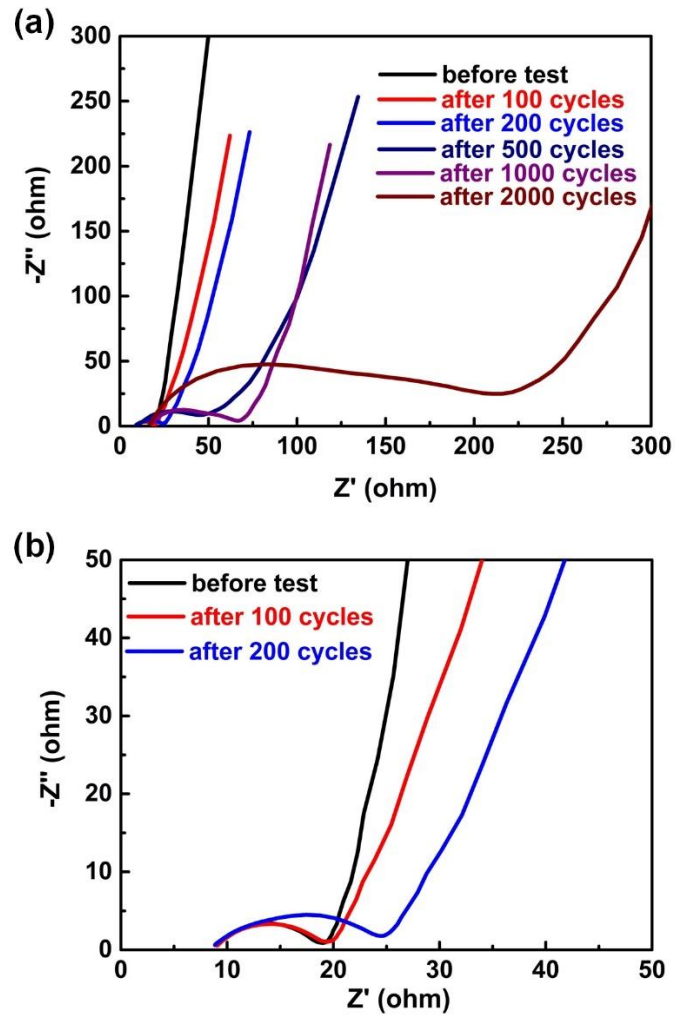

1

2 **Figure S17.** a) Nyquist plots for pTTPN@600 electrode after different cycle numbers.  
 3 b) Partial enlargement of the Nyquist plots.

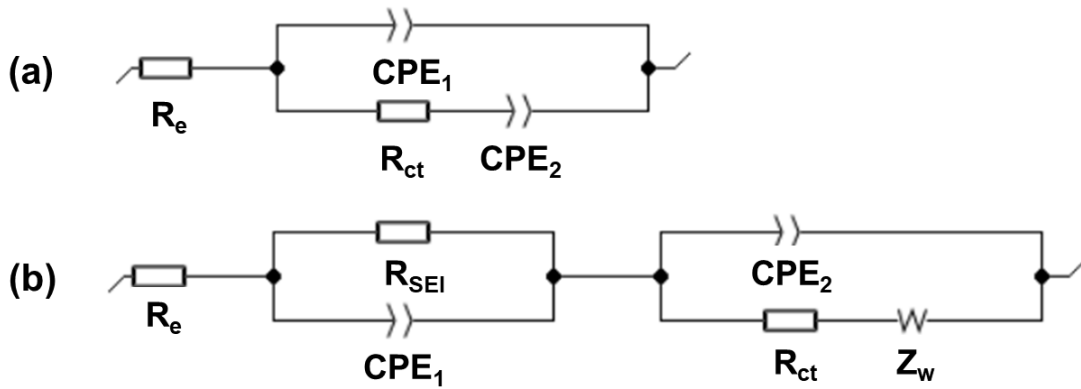

4

5 **Figure S18.** Equivalent circuits used for fitting the EIS plots a) Before test, b) After  
 6 different cycle numbers.



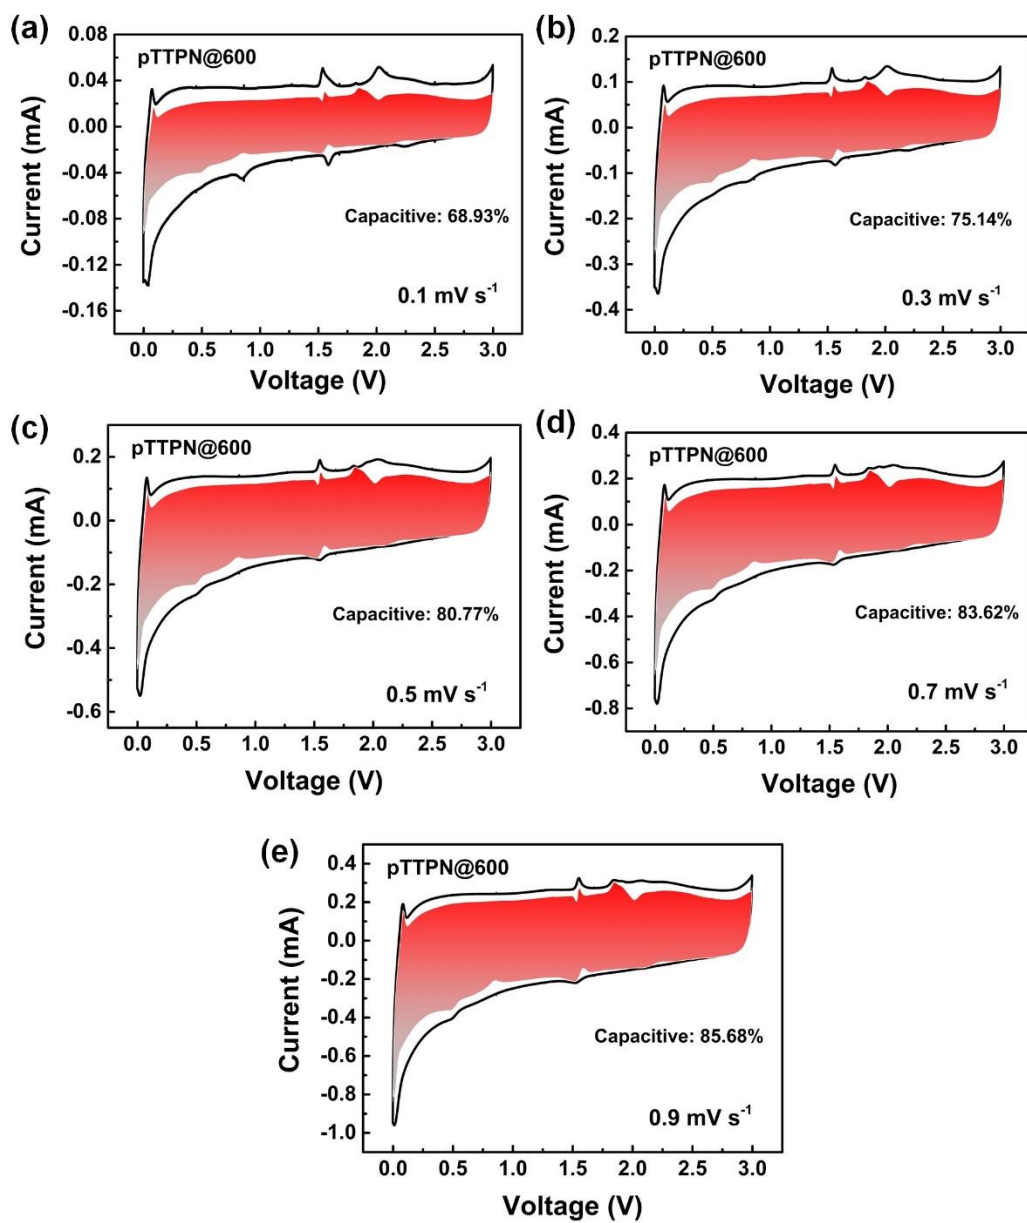

1

2 **Figure S19.** Separation of storage contributions of pTTPN@600 electrode from the  
 3 capacitance and diffusion-controlled process at various scan rates: a)  $0.1\text{mV s}^{-1}$ , b)  
 4  $0.3\text{mV s}^{-1}$ , c)  $0.5\text{mV s}^{-1}$ , d)  $0.7\text{mV s}^{-1}$ , and e)  $0.9\text{mV s}^{-1}$ .

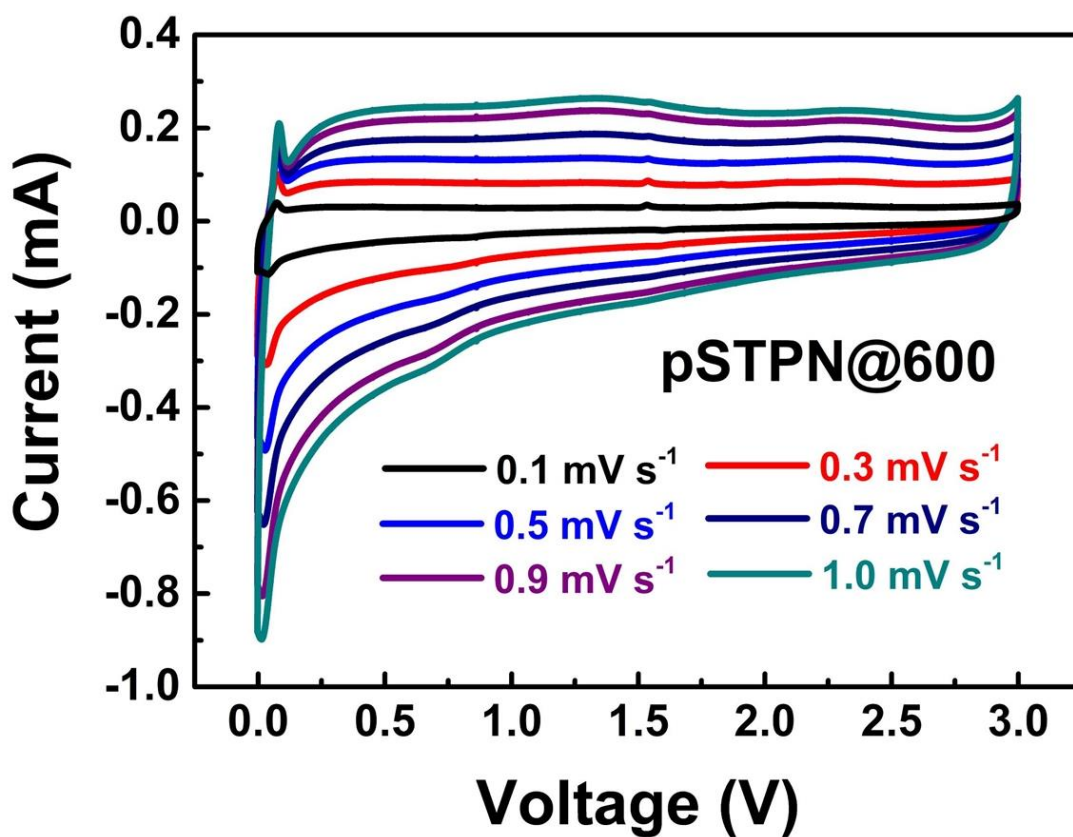

1  
2

Figure S20. CV curves of pSTPN@600 electrode at different scan rates.

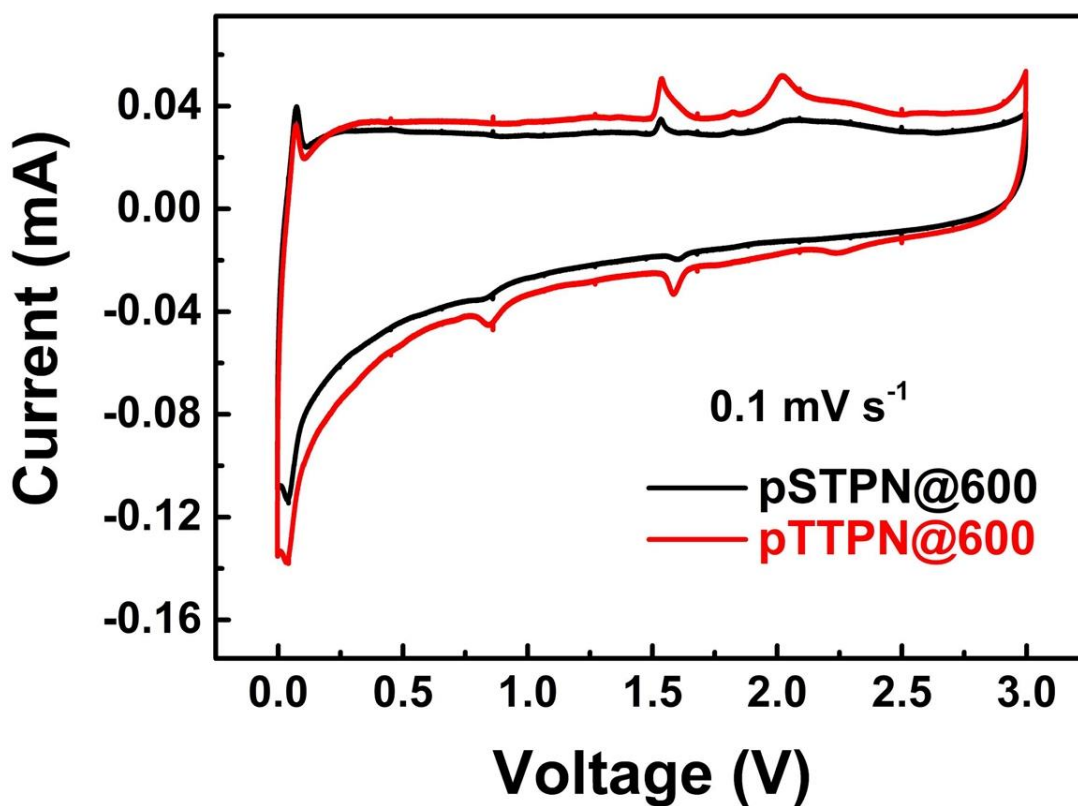

3  
4  
5

Figure S21. CV curves of the pSTPN@600 and pTTPN@600 electrodes at 0.1 mV s<sup>-1</sup>.

1 **Table S1.** Impedance parameters of pTTPN@600 electrode after different cycling  
 2 numbers.

| pTTPN@600         | $R_e^a(\Omega)$ | $R_{SEI}^b(\Omega)$ | $R_{ct}^c(\Omega)$ |
|-------------------|-----------------|---------------------|--------------------|
| prior to cycling  | 8.58            |                     | 11.06              |
| after 100 cycles  | 8.71            | 10.90               | 8.61               |
| after 200 cycles  | 8.85            | 17.71               | 15.47              |
| after 500 cycles  | 8.98            | 44.40               | 41.38              |
| after 1000 cycles | 15.17           | 53.49               | 49.96              |
| after 2000 cycles | 16.66           | 108.8               | 70.30              |

3 <sup>a</sup>  $R_e$ : electrolyte resistance.

4 <sup>b</sup>  $R_{SEI}$ : SEI layer resistance.

5 <sup>c</sup>  $R_{ct}$ : charger-transfer resistance.

6

7 **Table S2.** Impedance parameters of the pSTPN@600, pSTPN@700, pSTPN@800,  
 8 pTTPN@600, pTTPN@700, and pTTPN@800 electrodes.

| Sample    | $R_e^a(\Omega)$ | $R_{ct}^b(\Omega)$ | Sample    | $R_e^a(\Omega)$ | $R_{ct}^b(\Omega)$ |
|-----------|-----------------|--------------------|-----------|-----------------|--------------------|
| pTTPN@600 | 8.584           | 11.06              | pSTPN@600 | 9.211           | 13.60              |
| pTTPN@700 | 10.69           | 16.78              | pSTPN@700 | 10.73           | 149.40             |
| pTTPN@800 | 8.616           | 197.70             | pSTPN@800 | 10.97           | 385.70             |

9 <sup>a</sup>  $R_e$ : electrolyte resistance.

10 <sup>b</sup>  $R_{ct}$ : charger-transfer resistance.

11

12

1 **Table S3** Comparison of electrochemical performances between pTTPN@600 and  
 2 carbon-based anode materials reported previously.

| Anode material                 | precursor       | Rate capability                                                                                                                                                                                                  | cyclability                                                          | Reference |
|--------------------------------|-----------------|------------------------------------------------------------------------------------------------------------------------------------------------------------------------------------------------------------------|----------------------------------------------------------------------|-----------|
| N-doped carbon sheet           | soybean         | 200 mA h g <sup>-1</sup> @ 0.3C<br>150 mA h g <sup>-1</sup> @ 1.5C<br>80 mA h g <sup>-1</sup> @ 4.5C<br>32.3 mA h g <sup>-1</sup> @ 30C<br>(1C=375 mA g <sup>-1</sup> )                                          | 50 mA h g <sup>-1</sup> @ 4.5C<br>after 2000 cycles                  | [3]       |
| Hard carbon microtubes         | cotton          | 310 mA h g <sup>-1</sup> @ 0.1C<br>275 mA h g <sup>-1</sup> @ 0.5C<br>190 mA h g <sup>-1</sup> @ 1.0C<br>80 mA h g <sup>-1</sup> @ 2.0C<br>(1C=300 mA g <sup>-1</sup> )                                          | 305 mA h g <sup>-1</sup> @ 0.1C<br>after 100 cycles                  | [4]       |
| Hard carbon                    | Apple           | 222 mA h g <sup>-1</sup> @ 0.2C<br>181 mA h g <sup>-1</sup> @ 1C<br>112 mA h g <sup>-1</sup> @ 5C<br>86 mA h g <sup>-1</sup> @ 10C<br>(1C=200 mA g <sup>-1</sup> )                                               | 85 mA h g <sup>-1</sup> @ 5C<br>after 1000 cycles                    | [5]       |
| S-doped carbon                 | PEDOT           | 327.8 mA h g <sup>-1</sup> @ 0.5A g <sup>-1</sup><br>242.0 mA h g <sup>-1</sup> @ 1.0A g <sup>-1</sup><br>192.5 mA h g <sup>-1</sup> @ 2.0A g <sup>-1</sup><br>119.5 mA h g <sup>-1</sup> @ 5.0A g <sup>-1</sup> | 302 mA h g <sup>-1</sup> @ 0.5A g <sup>-1</sup><br>after 700cycles   | [6]       |
| Graphene-coupled porous carbon | Graphene, CTF   | 155 mA h g <sup>-1</sup> @ 0.1A g <sup>-1</sup><br>150 mA h g <sup>-1</sup> @ 0.5A g <sup>-1</sup><br>140 mA h g <sup>-1</sup> @ 1.0A g <sup>-1</sup><br>133 mA h g <sup>-1</sup> @ 5.0A g <sup>-1</sup>         | 137 mA h g <sup>-1</sup> @ 1.0A g <sup>-1</sup><br>after 500cycles   | [7]       |
| Mesoporous soft carbon         | Mesophase pitch | 260 mA h g <sup>-1</sup> @ 0.05A g <sup>-1</sup><br>193 mA h g <sup>-1</sup> @ 0.1A g <sup>-1</sup><br>105 mA h g <sup>-1</sup> @ 1.0A g <sup>-1</sup><br>62 mA h g <sup>-1</sup> @ 5.0A g <sup>-1</sup>         | 103 mA h g <sup>-1</sup> @ 0.5A g <sup>-1</sup><br>after 3000cycles  | [8]       |
| Porous carbon                  | Carbon black    | 196 mA h g <sup>-1</sup> @ 0.1A g <sup>-1</sup><br>159 mA h g <sup>-1</sup> @ 0.4A g <sup>-1</sup><br>133 mA h g <sup>-1</sup> @ 1.6A g <sup>-1</sup><br>120 mA h g <sup>-1</sup> @ 3.2A g <sup>-1</sup>         | 72 mA h g <sup>-1</sup> @ 3.2 A g <sup>-1</sup><br>after 2000cycles  | [9]       |
| Hard carbon                    | loofah          | 300 mA h g <sup>-1</sup> @ 0.5C<br>260 mA h g <sup>-1</sup> @ 1.0 C<br>217 mA h g <sup>-1</sup> @ 3.0C<br>60 mA h g <sup>-1</sup> @ 20C<br>(1C=300 mA g <sup>-1</sup> )                                          | 74 mA h g <sup>-1</sup> @ 2.1 A g <sup>-1</sup><br>after 2000cycles  | [10]      |
| 2D N-doped carbon nanosheets   | Zn-HMT MOF      | 294 mA h g <sup>-1</sup> @ 0.2A g <sup>-1</sup><br>274 mA h g <sup>-1</sup> @ 0.5A g <sup>-1</sup><br>245 mA h g <sup>-1</sup> @ 1.0A g <sup>-1</sup><br>215 mA h g <sup>-1</sup> @ 5.0A g <sup>-1</sup>         | 170 mA h g <sup>-1</sup> @ 5.0 A g <sup>-1</sup><br>after 1000cycles | [11]      |

|                                     |                       |                                                                                                                                                                                                                              |                                                                       |                  |
|-------------------------------------|-----------------------|------------------------------------------------------------------------------------------------------------------------------------------------------------------------------------------------------------------------------|-----------------------------------------------------------------------|------------------|
| Shell-like N,S co-doped thin carbon | MoF/PVP               | 372 mA h g <sup>-1</sup> @ 0.5A g <sup>-1</sup><br>316 mA h g <sup>-1</sup> @ 1.0A g <sup>-1</sup><br>239 mA h g <sup>-1</sup> @ 8.0A g <sup>-1</sup><br>169 mA h g <sup>-1</sup> @ 32A g <sup>-1</sup>                      | 2000 mA h g <sup>-1</sup> @ 16 A g <sup>-1</sup> after 4500cycles     | [12]             |
| 3D Framework Carbon                 | Sodium Citrate        | 400 mA h g <sup>-1</sup> @ 0.1A g <sup>-1</sup><br>278 mA h g <sup>-1</sup> @ 0.5A g <sup>-1</sup><br>200 mA h g <sup>-1</sup> @ 1.0A g <sup>-1</sup><br>105 mA h g <sup>-1</sup> @ 5.0A g <sup>-1</sup>                     | 99 mA h g <sup>-1</sup> @ 10 A g <sup>-1</sup> after 10000cycles      | [13]             |
| CQDs transformed 3DCFs              | NaOH/ethanol          | 208 mA h g <sup>-1</sup> @ 0.1A g <sup>-1</sup><br>127 mA h g <sup>-1</sup> @ 1.0A g <sup>-1</sup><br>93 mA h g <sup>-1</sup> @ 5.0A g <sup>-1</sup>                                                                         | 87 mA h g <sup>-1</sup> @ 10.0A g <sup>-1</sup> after 6500cycles      | [14]             |
| 3D macroporous structure            | GO/NCL                | 247 mA h g <sup>-1</sup> @ 0.5A g <sup>-1</sup><br>219 mA h g <sup>-1</sup> @ 1.0A g <sup>-1</sup><br>90 mA h g <sup>-1</sup> @ 10.0A g <sup>-1</sup>                                                                        | 257 mA h g <sup>-1</sup> @ 0.5A g <sup>-1</sup> after 2500cycles      | [15]             |
| hierarchical N-doped porous carbon  | Water hyacinths       | 248 mA h g <sup>-1</sup> @ 0.05A g <sup>-1</sup><br>217 mA h g <sup>-1</sup> @ 0.1A g <sup>-1</sup><br>141 mA h g <sup>-1</sup> @ 0.8A g <sup>-1</sup><br>120 mA h g <sup>-1</sup> @ 1.6A g <sup>-1</sup>                    | 140 mA h g <sup>-1</sup> @ 0.4A g <sup>-1</sup> after 1000cycles      | [16]             |
| <b>Hierarchical porous carbon</b>   | <b>Porous polymer</b> | <b>248 mA h g<sup>-1</sup> @ 0.05A g<sup>-1</sup></b><br><b>224 mA h g<sup>-1</sup> @ 0.1A g<sup>-1</sup></b><br><b>134 mA h g<sup>-1</sup> @ 1.0A g<sup>-1</sup></b><br><b>95 mA h g<sup>-1</sup> @ 5.0A g<sup>-1</sup></b> | <b>74 mA h g<sup>-1</sup> @ 10.0A g<sup>-1</sup> after 2000cycles</b> | <b>This work</b> |

1  
2

1   References:

- 2   [1] K. Yuan, C. Liu, J. Han, G. Yu, J. Wang, H. Duan, Z. Wang, X. Jian, *RSC Adv.*, 2016, **6**, 12009-12020.
- 3   [2] J. Han, K. Yuan, C. Liu, J. Wang, X. Jian, *RSC Adv.*, 2015, **5**, 30445-30455.
- 4   [3] T. Yang, T. Qian, M. Wang, X. Shen, N. Xu, Z. Sun, C. Yan, *Adv. Mater.* 2016, **28**, 539-545.
- 5   [4] Y. Li, Y.S. Hu, M.M. Titirici, L. Chen, X. Huang, *Adv. Energy Mater.*, 2016, **6**, 1600659.
- 6   [5] L. Wu, D. Buchholz, C. Vaalma, G. A. Giffin, S. Passerini, *ChemElectroChem*, 2016, **3**, 292-298.
- 7   [6] L. Qie, W. Chen, X. Xiong, C. Hu, F. Zou, P. Hu, Y. Huang, *Adv Sci*, 2015, **2**, 1500195.
- 8   [7] J. Zhu, X. Zhuang, J. Yang, X. Feng, S.i. Hirano, *J. Mater. Chem. A*, 2017, **5**, 16732-16739.
- 9   [8] B. Cao, H. Liu, B. Xu, Y. Lei, X. Chen, H. Song, *J. Mater. Chem. A*, 2016, **4**, 6472-6478.
- 10   [9] W. Xiao, Q. Sun, J. Liu, B. Xiao, P.A. Glans, J. Li, R. Li, J. Guo, W. Yang, T.K. Sham, X. Sun, *Nano Res.*,  
11   2017, **10**, 4378-4387.
- 12   [10] Y.-E. Zhu, L. Yang, X. Zhou, F. Li, J. Wei, Z. Zhou, *J. Mater. Chem. A*, 2017, **5**, 9528-9532.
- 13   [11] S. Liu, J. Zhou, H. Song, *Adv. Energy Mater.*, 2018, **8**, 1800569.
- 14   [12] A. Mahmood, S. Li, Z. Ali, H. Tabassum, B. Zhu, Z. Liang, W. Meng, W. Aftab, W. Guo, H. Zhang, M.  
15   Yousaf, S. Gao, R. Zou, Y. Zhao, *Adv. Mater.*, 2019, **31**, 1805430.
- 16   [13] B. Yang, J. Chen, S. Lei, R. Guo, H. Li, S. Shi, X. Yan, *Adv. Energy Mater.*, 2018, **8**, 1702409.
- 17   [14] P. Wang, B. Yang, G. Zhang, L. Zhang, H. Jiao, J. Chen, X. Yan, *Chem. Eng. J.*, 2018, **353**, 453-459.
- 18   [15] B. Chang, J. Chen, M. Zhou, X. Zhang, W. Wei, B. Dai, S. Han, Y. Huang, *Chem Asian J.*, 2018, **13**,  
19   3859-3864.
- 20   [16] G. Zeng, B. Zhou, L. Yi, H. Li, X. Hu, Y. Li. *Sustainable Energy Fuels*. 2018, **2**, 855-861.

21
